# Supplementary material for: Two-directional synthesis as a tool for diversity-oriented synthesis: Synthesis of alkaloid scaffolds
Source: publisher site journal article supplement (doi:10.3762/bjoc.8.95), 2012-06-06

## Supporting Information

for

# Two-directional synthesis as a tool for diversity-oriented synthesis: Synthesis of alkaloid scaffolds

Kieron M. G. O'Connell<sup>1</sup>, Monica Díaz-Gavilán<sup>1,§</sup>, Warren R. J. D. Galloway<sup>1</sup> and David R. Spring<sup>\*1</sup>

Address: <sup>1</sup>Department of Chemistry, University of Cambridge, Lensfield Rd, Cambridge, CB2 1EW, UK

<sup>§</sup>Present address: Departamento de Química Farmacéutica y Orgánica, Facultad de Farmacia, Campus de Cartuja, s.n. 18071 Granada, Spain

Email: David R. Spring - [spring@ch.cam.ac.uk](mailto:spring@ch.cam.ac.uk)

\* Corresponding author

## NMR Spectra of novel compounds

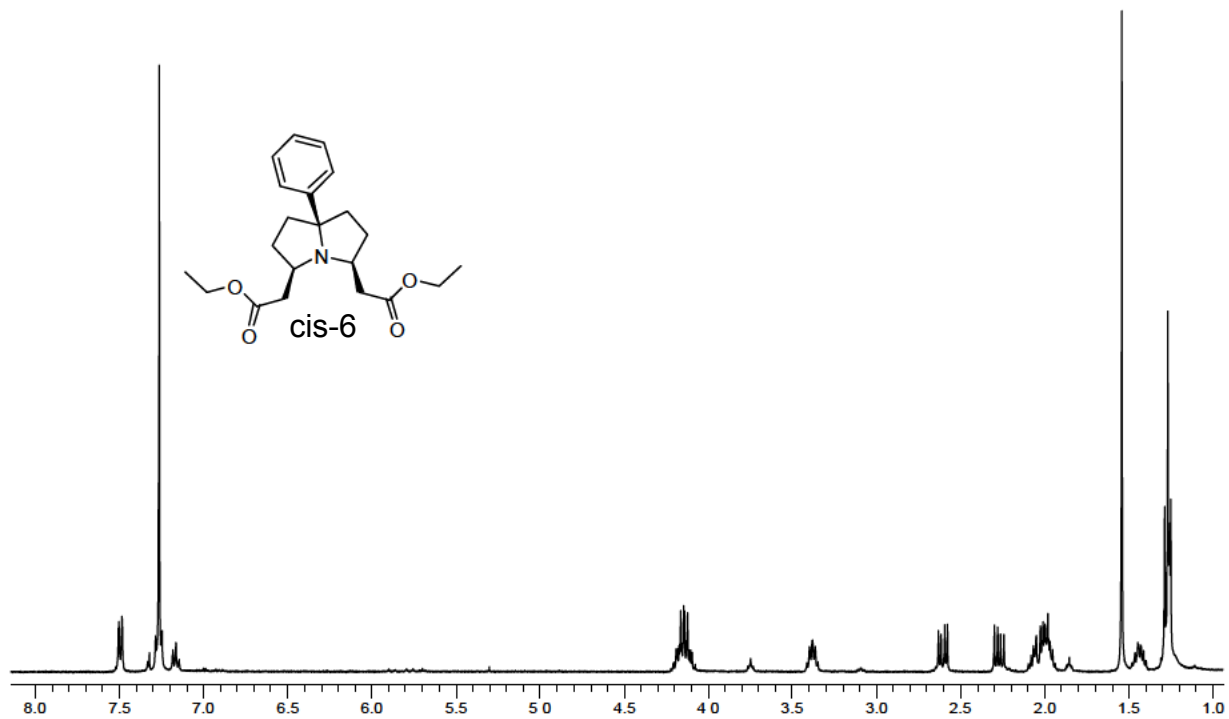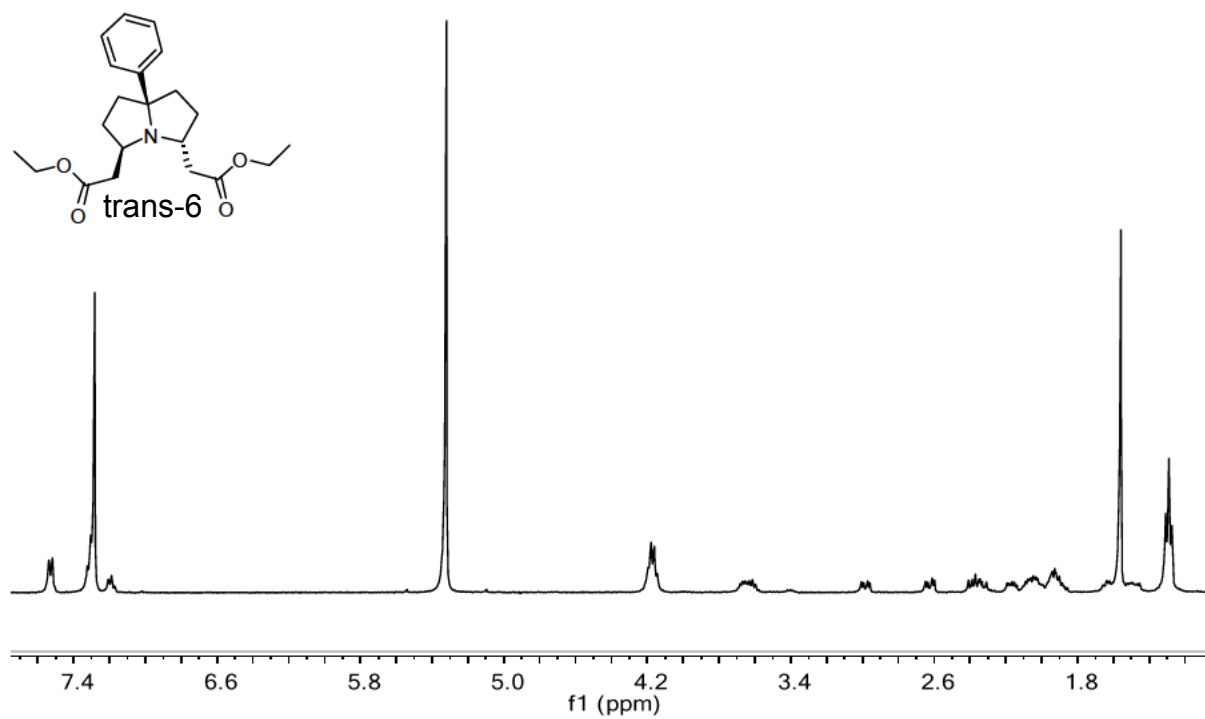

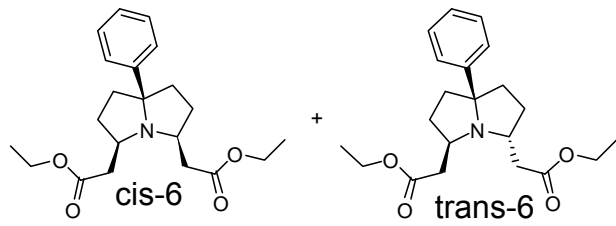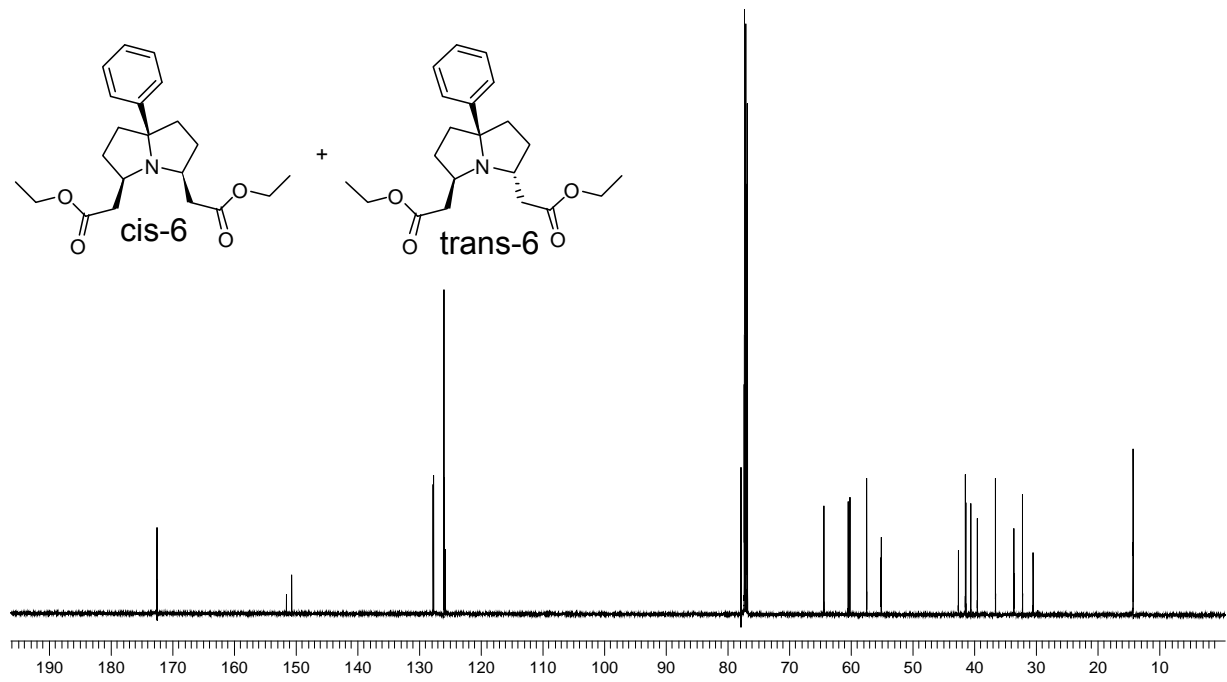

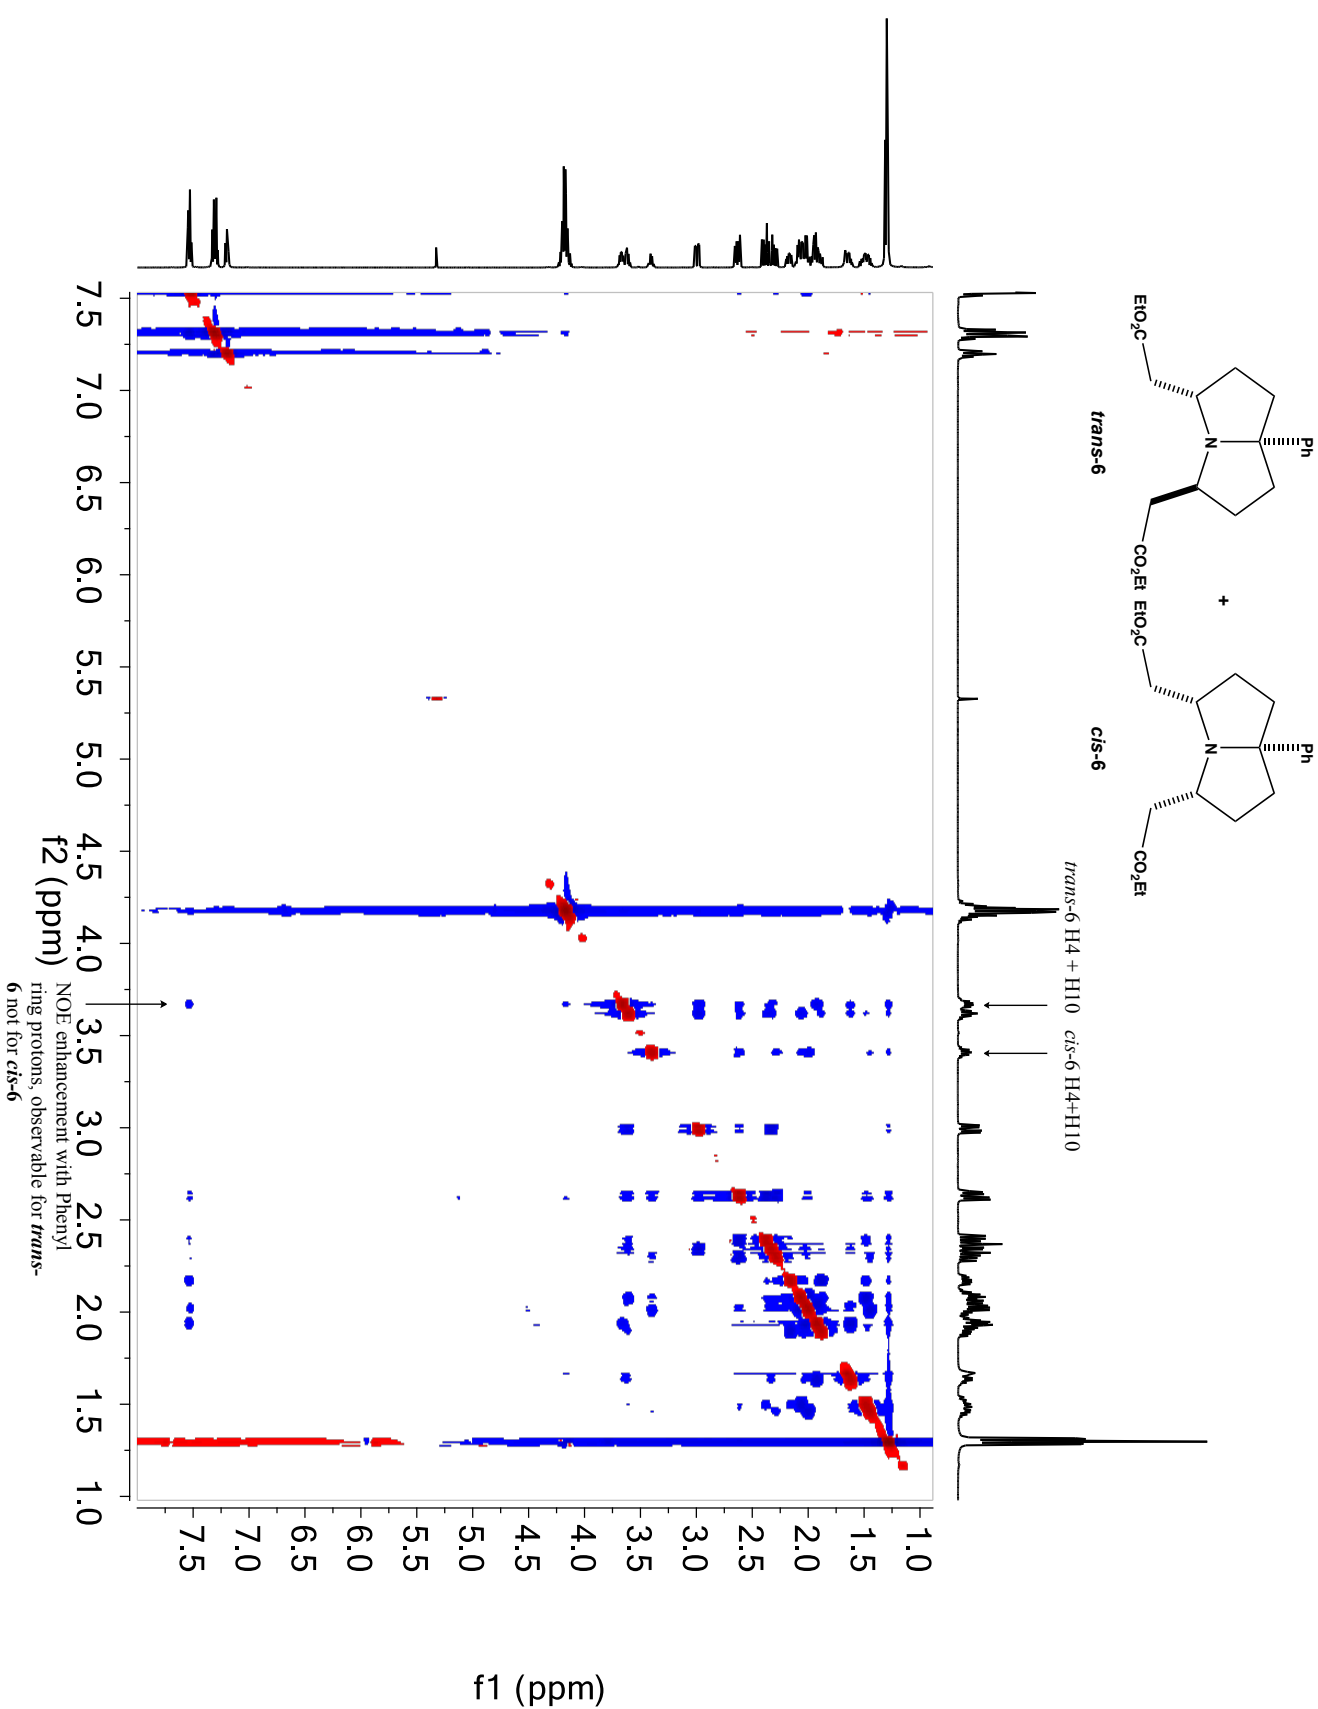

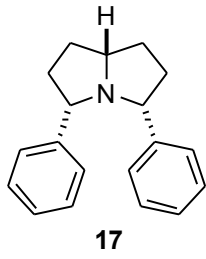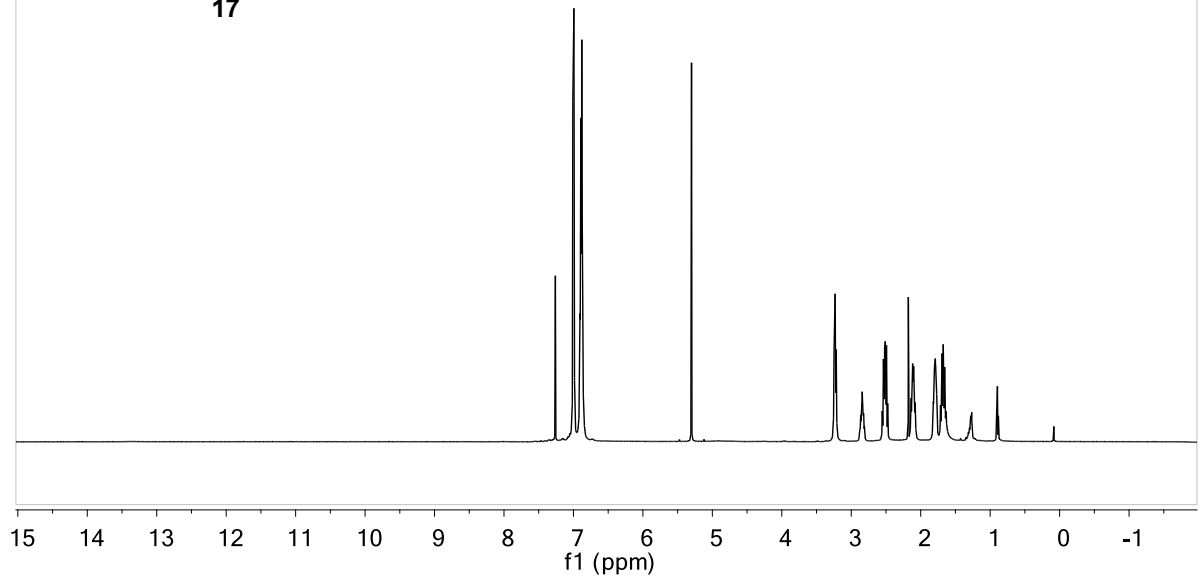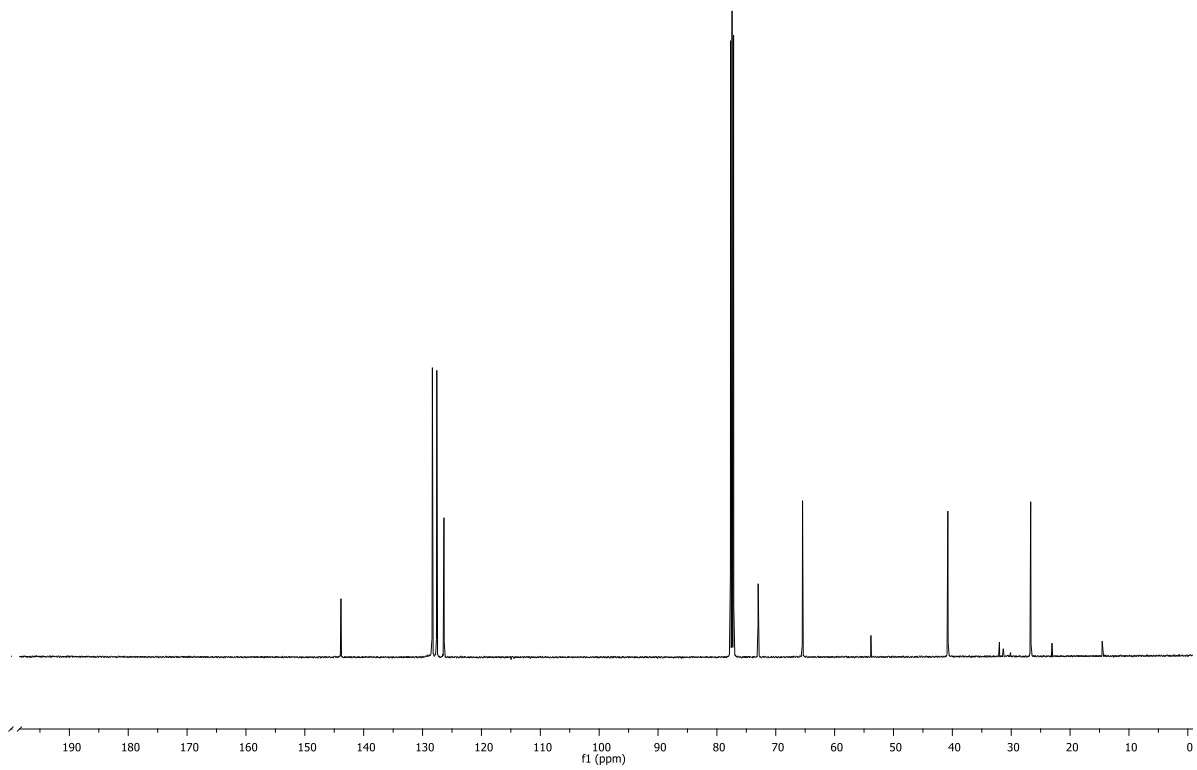

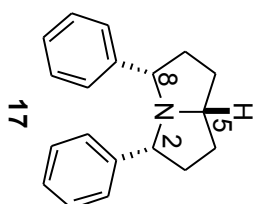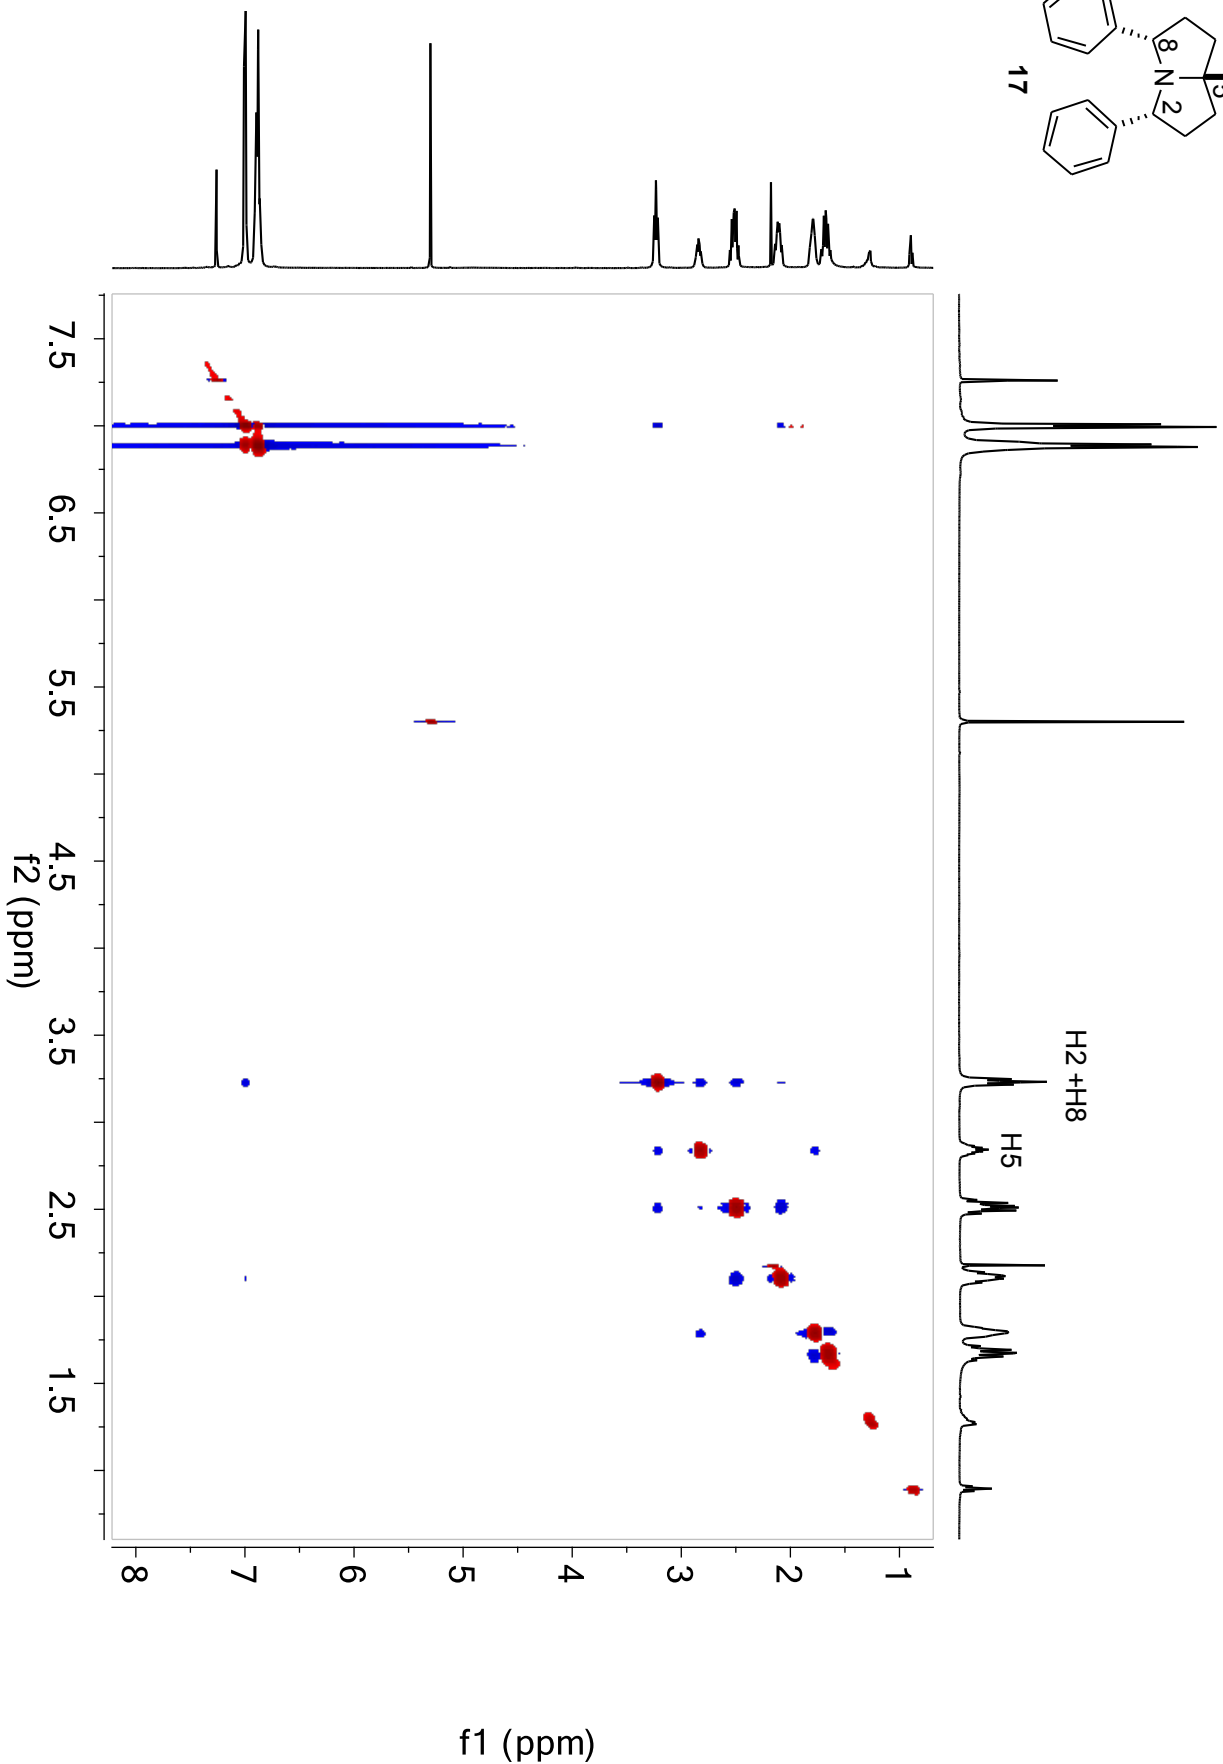

Supplement: Additional file 2 [file 1860-5397-8-95-S2.pdf]
